# Supplementary material for: Modulation of lytic molecules restrain serial killing in γδ T lymphocytes
Source: PubMed Central journal article supplement (PMC10533871; doi:10.1038/s41467-023-41634-7), 2023-09-27
Supplement: 41467_2023_41634_MOESM1_ESM.pdf [file 41467_2023_41634_MOESM1_ESM.pdf]

## Supplementary Information File

### Modulation of lytic molecules restrain serial killing in $\gamma\delta$ T lymphocytes

#### Authors

Patrick A. Sandoz<sup>1,†,\*</sup>, Kyra Kuhnigk<sup>2,†</sup>, Edina K. Szabo<sup>3,4</sup>, Sarah Thunberg<sup>1</sup>, Elina Erikson<sup>1</sup>, Niklas Sandström<sup>1</sup>, Quentin Verron<sup>1</sup>, Andreas Brech<sup>5,6,7</sup>, Carsten Watzl<sup>8</sup>, Arnika K. Wagner<sup>2</sup>, Evren Alici<sup>2</sup>, Karl-Johan Malmberg<sup>2,3,4</sup>, Michael Uhlin<sup>9,10</sup> and Björn Önfelt<sup>1,2,11,\*</sup>

#### Affiliations

<sup>1</sup> Department of Applied Physics, Science for Life Laboratory, KTH Royal Institute of Technology, Stockholm, Sweden

<sup>2</sup> Department of Medicine Huddinge, Karolinska Institutet, Karolinska University Hospital, Stockholm, Sweden.

<sup>3</sup> Precision Immunotherapy Alliance, University of Oslo, Oslo, Norway

<sup>4</sup> Department of Cancer Immunology, Institute for Cancer Research, Oslo University Hospital, Oslo, Norway.

<sup>5</sup> Cancell, Centre for Cancer Cell Reprogramming, Department for Clinical Medicine, University of Oslo, Oslo, Norway

<sup>6</sup> Department of Biosciences, University of Oslo, Oslo, Norway.

<sup>7</sup> Department of Mol. Cell Biology, Institute for Cancer Research, Oslo University Hospital, Oslo, Norway

<sup>8</sup> Department for Immunology, Leibniz Research Centre for Working Environment and Human Factors, TU Dortmund, Dortmund, Germany

<sup>9</sup> CLINTEC, Karolinska Institutet, Stockholm, Sweden

<sup>10</sup> Department of Clinical Immunology and Transfusion Medicine, Karolinska University Hospital, Stockholm, Sweden

<sup>11</sup> Department of Microbiology, Tumour and Cell Biology, Karolinska Institutet, Stockholm, Sweden

† Equally Contributing Authors

\* Corresponding Authors

Corresponding authors email: [psandoz@kth.se](mailto:psandoz@kth.se) & [onfelt@kth.se](mailto:onfelt@kth.se)

# Supplementary Figures

## Supplementary Figure 1.

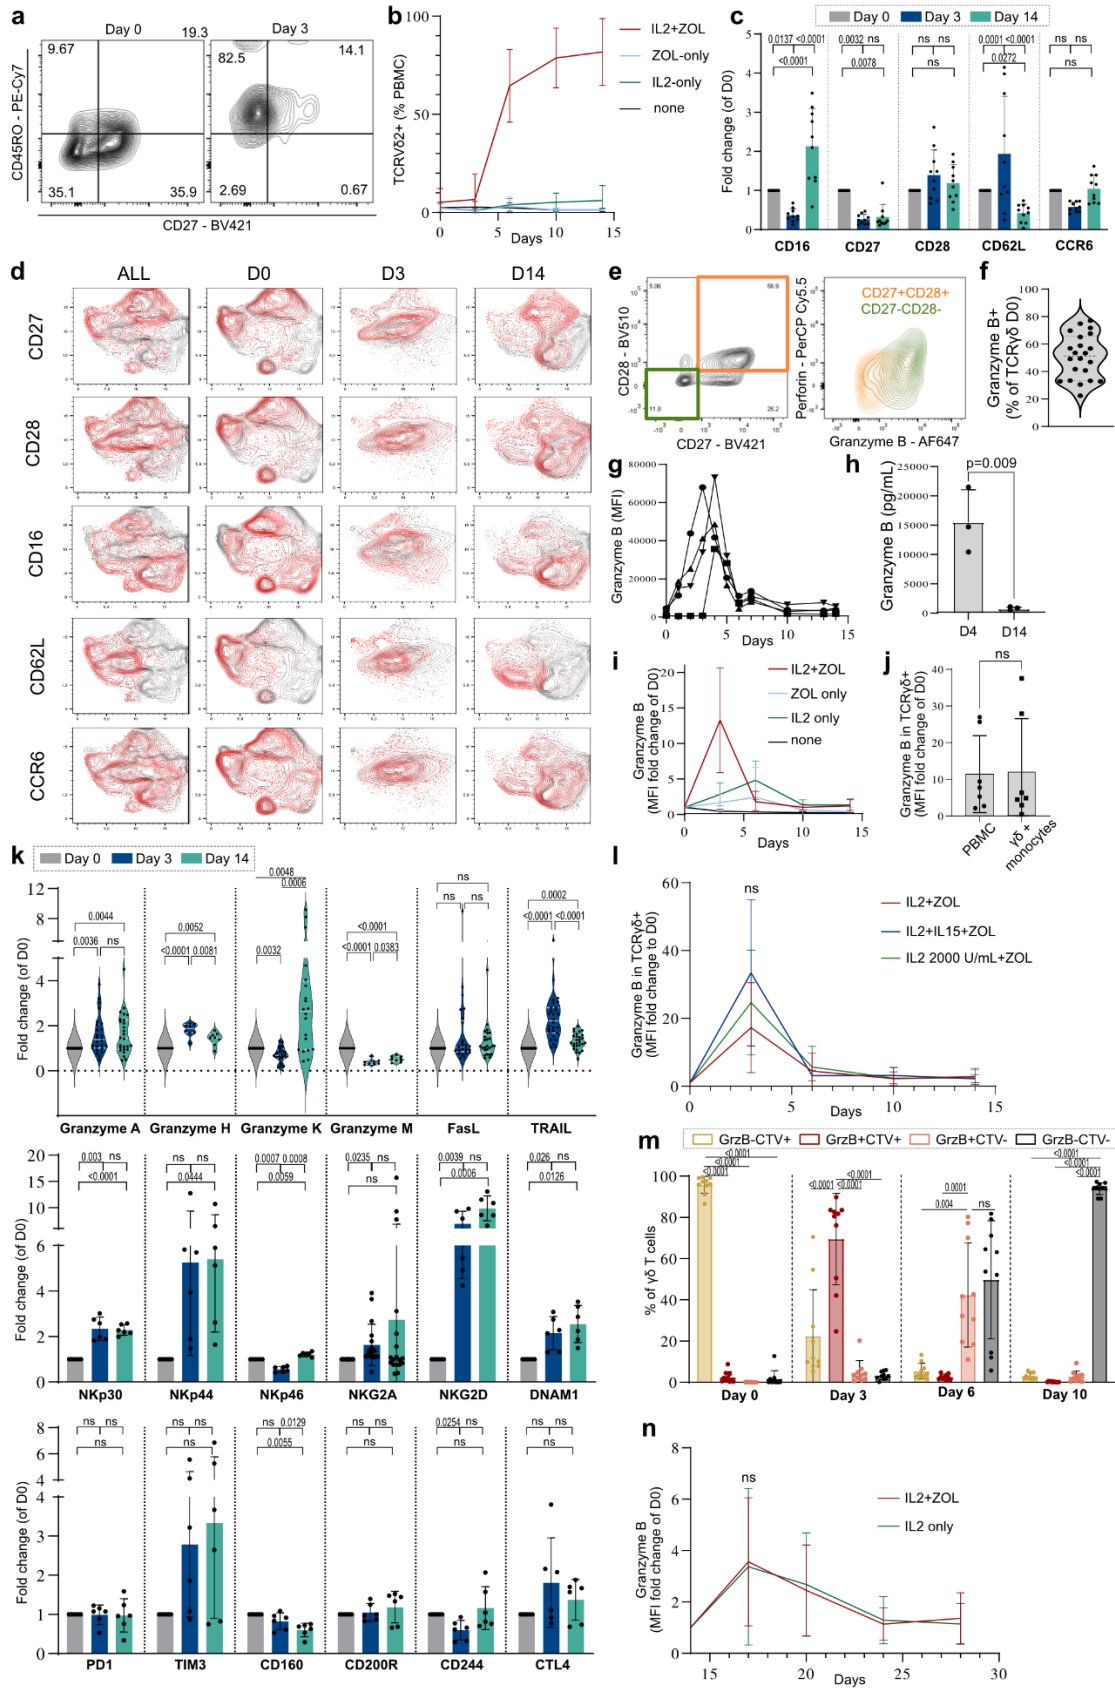

**Supplementary Figure 1. V $\gamma$ 9V $\delta$ 2 T cells transiently upregulate granzyme B before expansion.** Dynamics of V $\gamma$ 9V $\delta$ 2 T cells expansion in peripheral blood mononuclear cells (PBMC) stimulated with zoledronate (ZOL) and IL2 were measured by flow cytometry at the indicated days. (a) CD45RO & CD27 expression in V $\gamma$ 9V $\delta$ 2 T cells. (b) Percentage of V $\delta$ 2 T cells in PBMC expansion upon IL2+ZOL, IL2-only, ZOL-only or none, n=3-12 donors. (c) Statistical analysis (ANOVA) of the markers on the UMAP clustering of Fig. 1e-f, n=10 donors. One dot represents the measurement for one donor. (d) Individual distribution of the markers shown on the UMAP graphs of Fig. 1e-f. (e) Gating on CD27+CD28+ or CD27-CD28- (left) in V $\gamma$ 9V $\delta$ 2 T cells and corresponding granzyme B and perforin expression (right) (10 concatenated donors). (f) Percentage of granzyme B positive resting V $\gamma$ 9V $\delta$ 2 T cells for n = 22 donors. (g) Daily measurement of granzyme B expression in V $\gamma$ 9V $\delta$ 2 T cells during the expansion for n=4 donors. (h) ELISA of granzyme B in lysed  $\gamma\delta$ D4 or  $\gamma\delta$ D14, n=3 donors. (i) Granzyme B expression in V $\gamma$ 9V $\delta$ 2 T cells from PBMCs stimulated with IL2+ZOL, IL2-only, ZOL-only or none, n=6 donors. (j) Granzyme B expression in  $\gamma\delta$  T cells on day 3 from either PBMCs or isolated  $\gamma\delta$  T cells co-cultured with isolated autologous monocytes, and stimulated with IL2+ZOL, n=7 donors. (k) Top-row, violin plot (centre line, median; dotted lines, upper and lower quartiles) and statistical comparison of fold changes according to Fig. 1g, n=8-28 donors. Middle and bottom rows, statistical analysis of the activating / inhibitory receptors and exhaustion markers of Fig. 1g, analysis by one-way ANOVA. (l) Granzyme B expression fold change (normalized to initial level) in V $\gamma$ 9V $\delta$ 2 T cells of PBMC stimulated with IL2+ZOL with or without IL15 addition, n=11 donors, or with the addition or not of IL2 at 2000 IU, n=7 donors. (m) Proportions of granzyme B and CTV expressed at high levels in  $\gamma\delta$  T cells (as of Fig. 1k) at the indicated timepoints of the expansion, n=10 donors, analysis by one-way ANOVA. (n) 14-days expanded  $\gamma\delta$  T cells were stained with CTV and re-stimulated in autologous thawed PBMCs with IL2 only or with IL2+ZOL. Granzyme B protein level was measured by flow cytometry in the CTV+ cells at the indicated timepoints, n=9 donors. All applicable plots show means with standard deviations unless specifically stated otherwise. Statistics were calculated using two-tailed paired t test if not stated otherwise. ns: not-significant.

## Supplementary Figure 2.

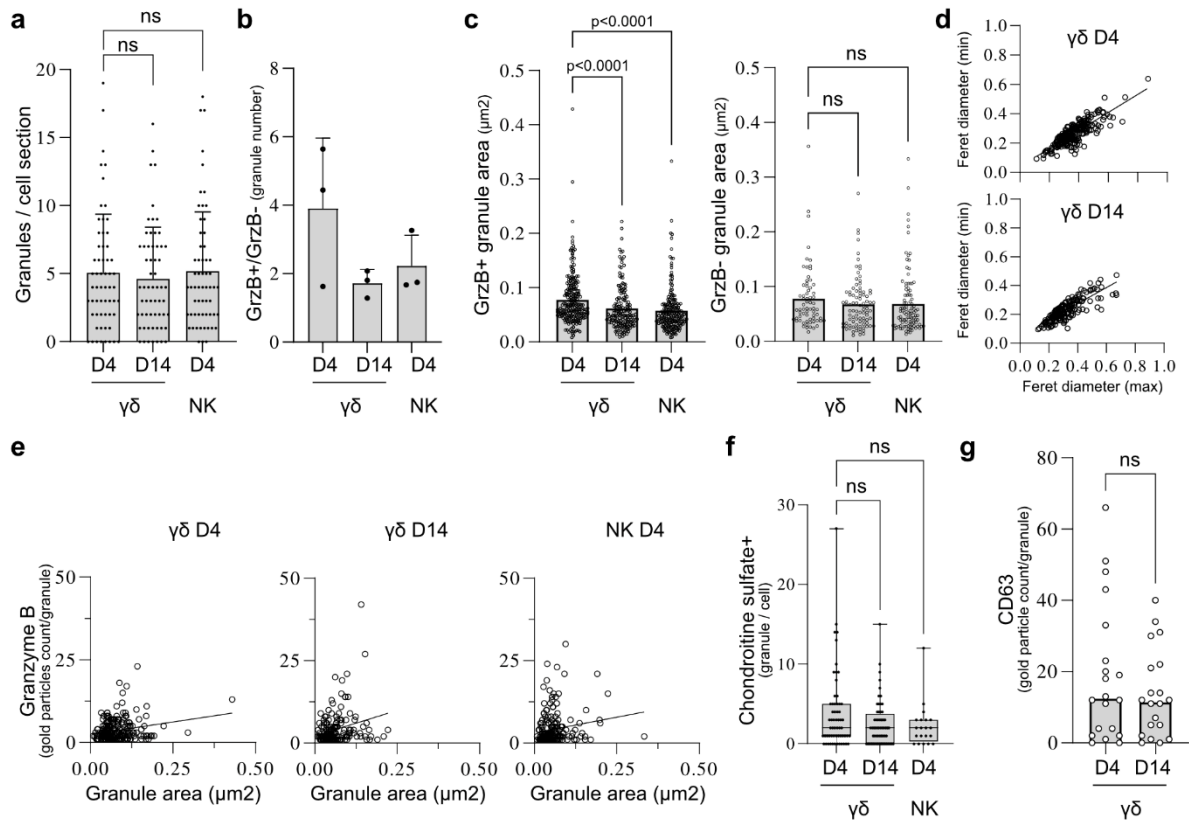

**Supplementary Figure 2.  $\text{V}\gamma 9\text{V}\delta 2$  T cell lytic vesicles are mature and loaded with granzyme B.** Immuno-EM gold nanoparticle labelling with anti-granzyme B (a-e) or anti-chondroitin sulfate (f) or anti-CD63 (g) antibodies of sections from  $\gamma\delta$ D4 or  $\gamma\delta$ D14 T cells or NKD4 cells from the same donors. 20 cells from the cell sections were imaged by transmission electron microscopy for each donor. (a) Quantification of the average number of dense core granules per cell (one transversal section per cell), means with standard deviations. One dot represents the average number of dense core granules for one cell section. (b) Ratio between the number of granzyme B labelled granules and the granzyme B absent granules, means with standard deviations. (c) Area of granzyme B unlabelled granules (right) and granzyme B labelled granules (left), bar plots represent the medians. (d) Minimum and maximum Feret diameters for each granule (circles) and the linear regression (black line) for  $\gamma\delta$  D4 or  $\gamma\delta$  D14 T cells. (e) Comparison of the granzyme B gold particle count per granule and the corresponding granule area (circles) and the linear regression (black line). (f) Number of anti-chondroitin sulfate labelled granules per cell, means with standard deviations. (g) Anti-CD63 labelling of 4-days or 14-days expanded  $\gamma\delta$  T cells of the same donor. Counts were pooled from 3 donors (a-e) or 1-3 donors (f-g). All analysis by Kruskal-Wallis test, ns: not-significant.

# Supplementary Figure 3.

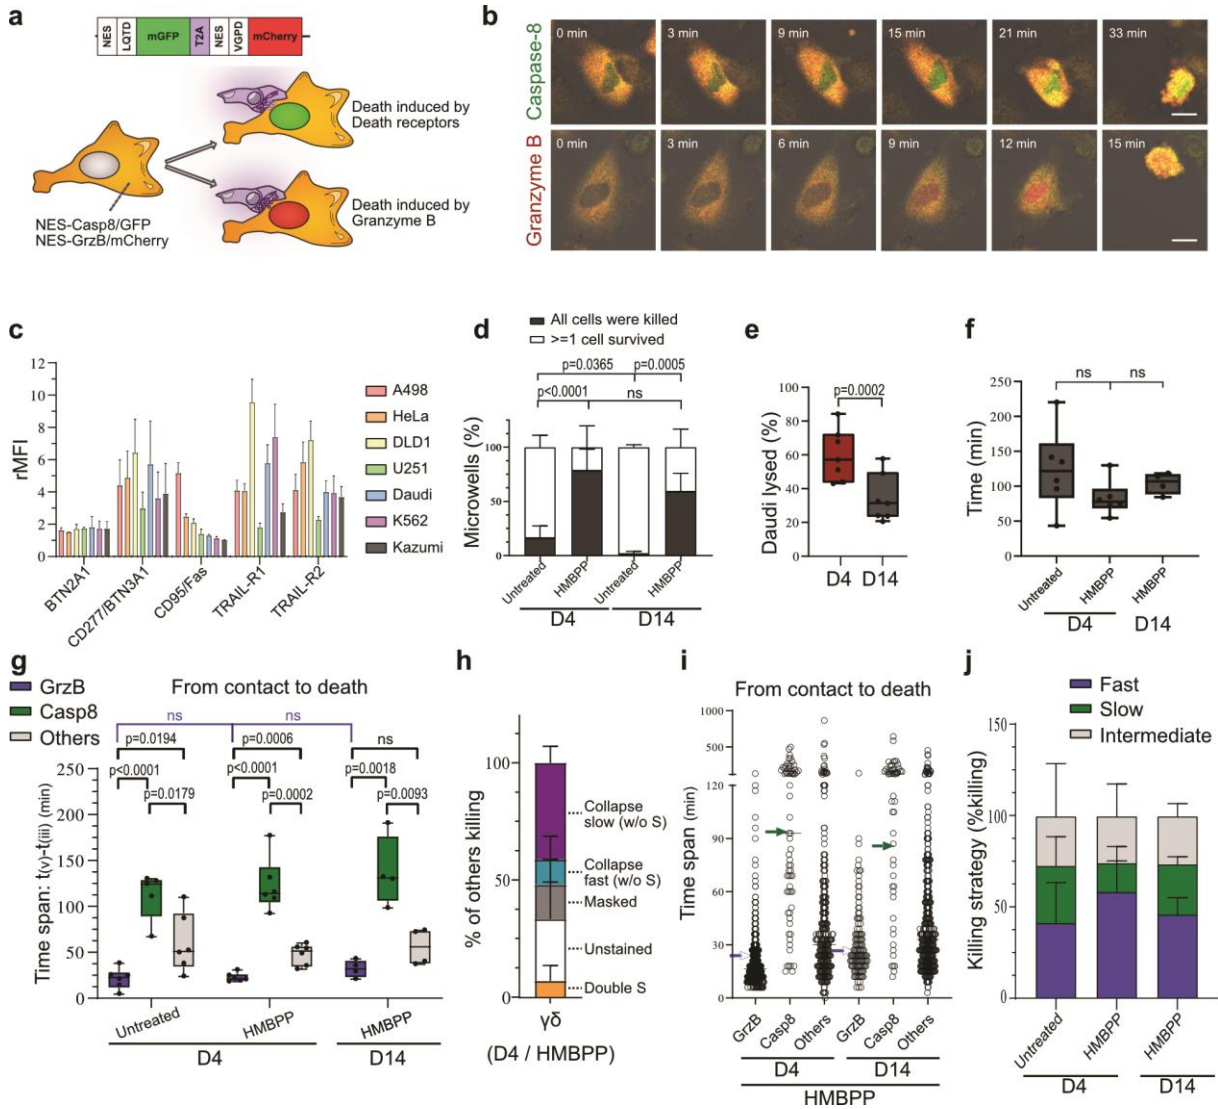

**Supplementary Figure 3. Individual  $\gamma\delta$  T cell killing potential and cytotoxic strategies.** (a) Scheme of the dual fluorescent reporter structure and function. Construct was inserted in the lentivirus vector. NES: nuclear exclusion signal. LQTD: specific for caspase-8 cleavage (downstream of death receptors activation). VGPD: specific for granzyme B cleavage. Death receptors-mediated killing leads to the diffusion of the green fluorescent protein into the nucleus. Granzyme-B mediated killing leads to the diffusion of the mCherry red fluorescent protein into the nucleus. (b) Examples of the two killing strategies as observed during the on-chip killing assay with isolated  $\gamma\delta$  T cells against A498GBDR target cells: death receptors mediated killing (top); granzyme B mediated killing (bottom). Scale bars: 10  $\mu\text{m}$ . Time starts at the first  $\gamma\delta$  T cell – target contact. (c) Expression of CD95/FasL, TRAIL-R2, CD277/BTN3A and BTN2A1 in various cell lines as measured by flow cytometry. rMFI shows the MFI measurement of the stained sample divided by its unstained control, n=2-6 replicates. (d) Fraction of the wells in which all A498GBDR targets were killed by  $\gamma\delta$  T cells during the 16 hr on-chip killing assay, n=4-6 donors. (e) Proportion of Daudi target cells killed by isolated  $\gamma\delta$ D4 or  $\gamma\delta$ D14 T cells at a 1:1 E:T ratio as measured by flow cytometry from in-tube 4 hr co-cultures, n=7 donors. The box limits represent upper and lower quartiles, and whiskers indicate the minimum and maximum values. (f) Time between the start of the on-chip killing assay and the first interaction between a  $\gamma\delta$  T cell and a A498GBDR for a lethal contact. n=6 ( $\gamma\delta$ D4) and 4 ( $\gamma\delta$ D14) donors. (g) Killing dynamics: time between the first contact of a  $\gamma\delta$  T cell with its target and the target's death for each mechanism, n=4-6 donors. (h) Others killing events: contribution of double nuclear staining (Double S), insufficiently stained A498GBDR, masked A498GBDR during killing, fast A498GBDR collapse without nuclear staining (w/o S) or slow A498GBDR collapse without staining in the on-chip killing assay with  $\gamma\delta$ D4 T cells and A498GBDR upon HMBPP, n=4 donors. (i) Killing dynamics for individual events (first cell-cell contact to target cell death) for each mechanism in the on-chip killing assay using  $\gamma\delta$ D4 or  $\gamma\delta$ D14 T cells. The blue arrows show the respective upper quartile (75%) of granzyme-B mediated killing dynamics. The green arrows show the respective lower quartile of the death-receptors mediated killing dynamics, n=4-6 donors pooled. (j) Proportion of the killing strategies (overall killing) after reclassification of the other mechanisms using the thresholds indicated in (i). All graphs show means with standard deviations unless specifically stated otherwise. The box plot line shows the median, the limits represent upper and lower quartiles, and whiskers indicate the minimum and maximum values. (e-g) One dot represents the measurement for one donor. Statistics were calculated using two-tailed Student's t test, ns: not-significant.

# Supplementary Figure 4.

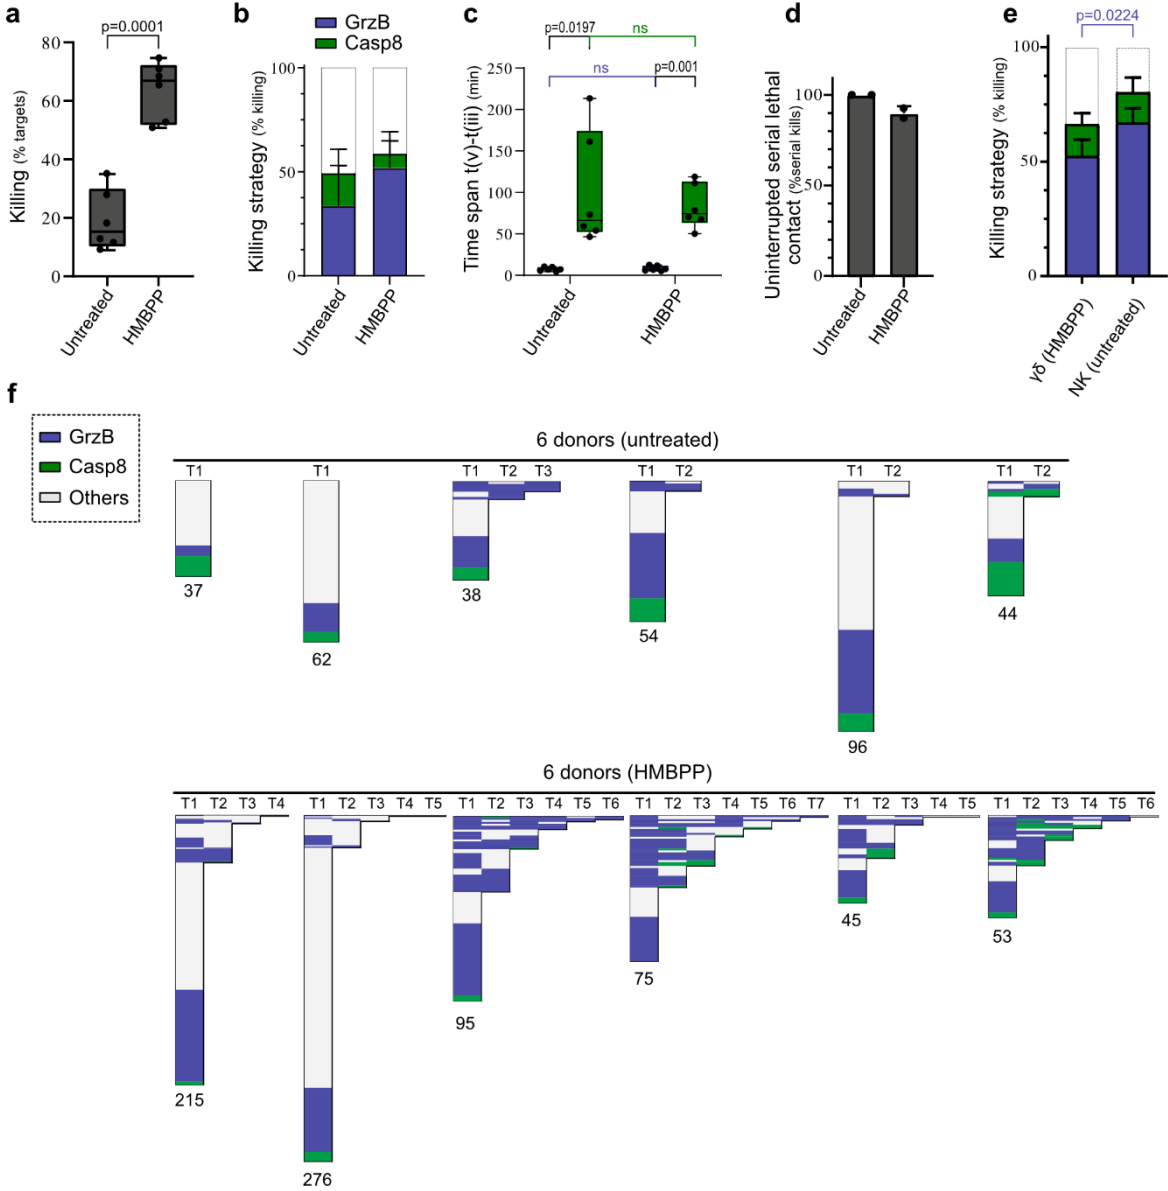

**Supplementary Figure 4. Characterization of V $\gamma$ 9V $\delta$ 2 T cells serial killing dynamics.** On-chip killing assay of A498GBDR target cell killing by  $\gamma\delta$ 4 T cells in 350  $\mu$ m wells with or without 1.5  $\mu$ M HMBPP added at the start of the assay, n=6 donors. (a) Proportion of A498GBDR target cells killed (b) Proportion of the killing strategies analysed by assessing the diffusion of the reporter into nuclei. (c) Time span between the first detection of reporter signal in the nucleus and the target death. (d) Proportion of killing events that was immediately followed by another killing event during serial killing. For this, we evaluated the contacts made by serial killing T cells from the first killing event to the last killing event for 2 donors. During active serial killing most target cells were killed and very rarely did the cell alternate between killing and non-killing. However, after the last observed killing event the T cells could form several non-lethal contacts with target cells. (e) Proportion of the killing strategies used by  $\gamma\delta$ 4 T cells (1.5  $\mu$ M HMBPP) or NKD4 cells, n=4 donors. (f) Killing series for individual donors, numbers under the first column indicate the number of one-target killed events (donors are pooled in Fig. 3c-d). All applicable graphs show means with standard deviations unless specifically stated otherwise. The box plot line shows the median, the limits represent upper and lower quartiles, and whiskers indicate the minimum and maximum values. (a,c-d) One dot represents the measurement for one donor. Statistics were calculated using two-tailed paired t-test, ns: not-significant.



# Supplementary Figure 5.

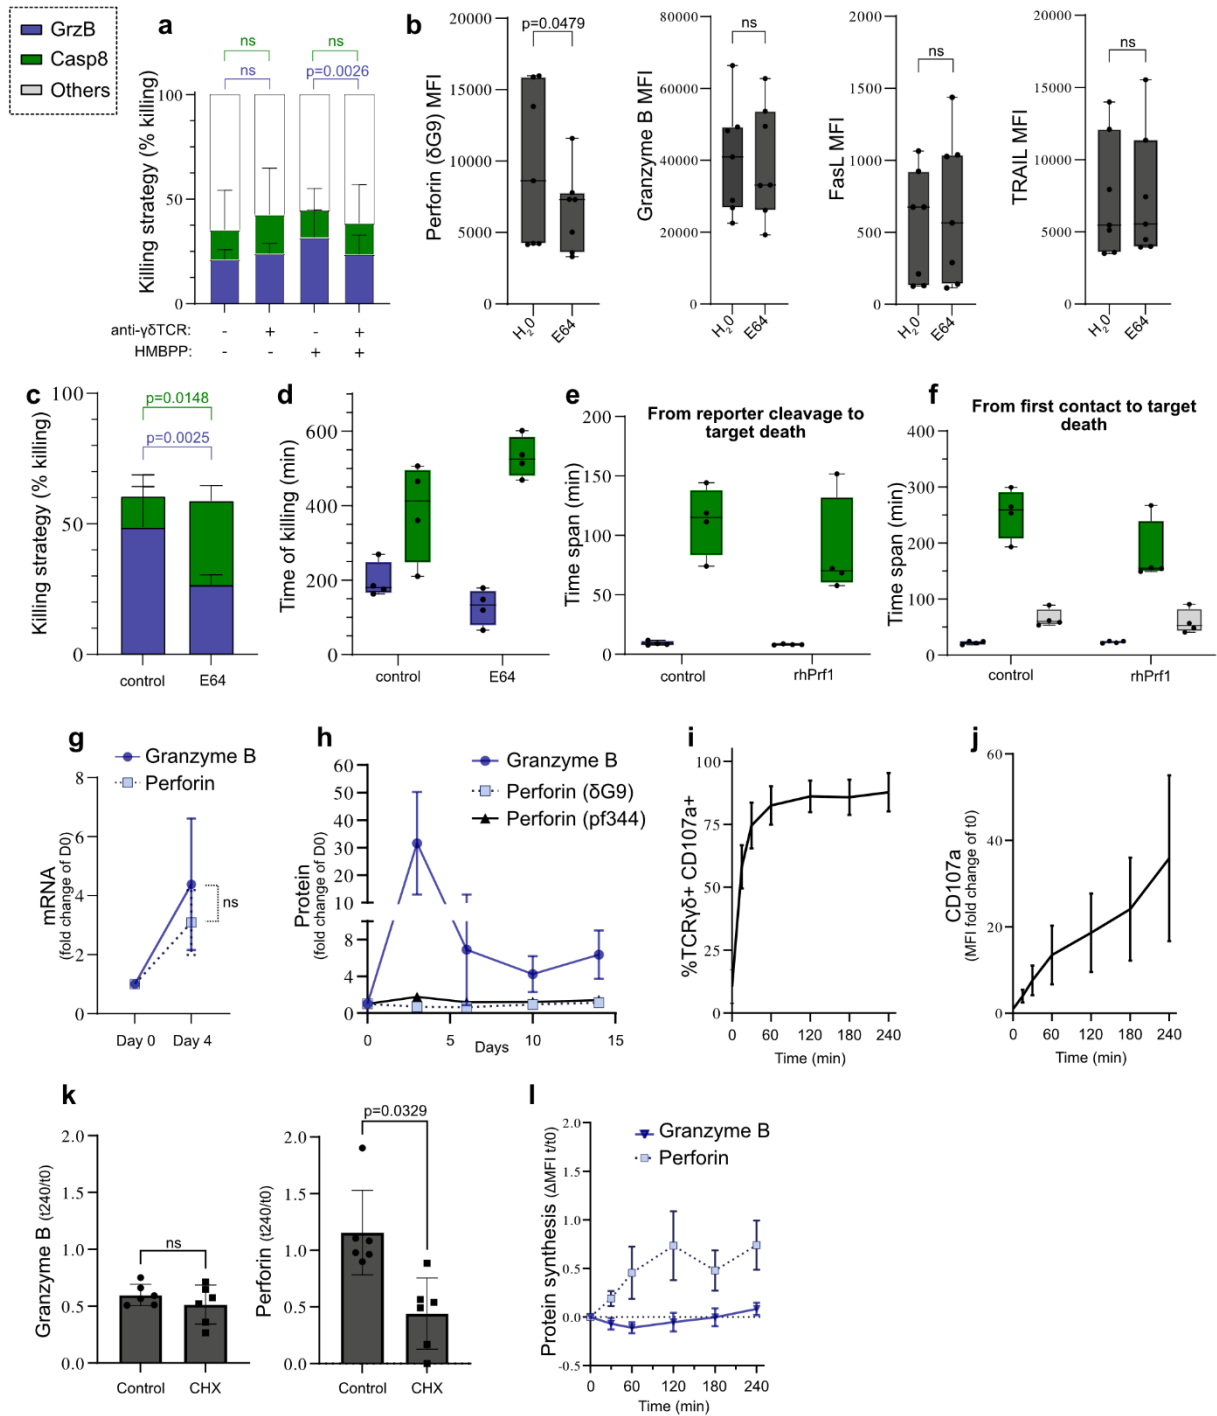

### **Supplementary Figure 5. Perforin availability is a bottleneck for $\gamma\delta$ T cell serial killing**

(a) Proportion of the killing strategies upon blocking with 5  $\mu\text{g}/\text{mL}$  of anti- $\gamma\delta\text{TCR}$  (or IgG antibody control) and treatment with or without 1.5  $\mu\text{M}$  HMBPP,  $n=4$  donors. (b-d) Isolated  $\gamma\delta\text{D4}$  T cells were treated or not with the E64 inhibitor for 24 hr. (b) Expression levels of perforin ( $\delta\text{G9}$  clone: mature perforin), granzyme B, TRAIL and FasL measured by flow cytometry,  $n=7$  donors. The box limits represent upper and lower quartiles, and whiskers indicate the minimum and maximum values. (c) On-chip killing assay with  $\gamma\delta\text{D4}$  T cells with or without E64 pre-treatment against A498GBDR target cells treated with 1.5  $\mu\text{M}$  of HMBPP. Proportion of the killing strategies and (d) Time of killing from the start of the assay for the different strategies with or without E64 treatment,  $n=4$  donors. (e-f) On-chip killing assay with  $\gamma\delta\text{D4}$  T cells against A498GBDR target cells treated with 1.5  $\mu\text{M}$  of HMBPP, with or without the addition of 60  $\text{ng}/\text{mL}$  recombinant human perforin (rhPrf1). (e) Time between the first detection of reporter signal in the nucleus until the target death,  $n=4$  donors. (f) Time between the first contact of a  $\gamma\delta$  T cell with its target and target cell death for each killing mechanism,  $n=4$  donors. (g) mRNA levels for granzyme B and perforin in resting  $\gamma\delta$  T cells compared to  $\gamma\delta\text{D4}$  T cells as measured by qPCR after normalization to a housekeeping gene,  $n=4$  donors. (h) Granzyme B and perforin (precursor and mature: clone Pf-344 or mature: clone  $\delta\text{G9}$ ) protein levels were measured by flow cytometry at the indicated timepoints and normalized to their respective initial levels,  $n=3$  donors. (i) In-tube CD107a degranulation assay of  $\gamma\delta\text{D4}$  T cells with 1.5  $\mu\text{M}$  HMBPP as measured by flow cytometry at the indicated timepoints,  $n=3$  donors. (j) In-tube CD107a degranulation assay of  $\gamma\delta\text{D4}$  T cells with 1.5  $\mu\text{M}$  HMBPP and monensin (blocking the surface recycling of CD107a) as measured by flow cytometry at the indicated timepoints,  $n=3$  donors. (k) Granzyme B (left) or perforin (right) cellular content measured by flow cytometry at the terminal timepoint (240 min) in  $\gamma\delta\text{D4}$  T cells treated with 1.5  $\mu\text{M}$  HMBPP with or without 2  $\mu\text{g}/\text{mL}$  of cycloheximide (CHX) from the start of degranulation assay,  $n=6$  donors. (l) Newly expressed granzyme B and perforin as the difference between untreated and cycloheximide-treated (data from Fig. 5i)  $\gamma\delta\text{D4}$  T cells during killing assay. All applicable graphs show means with standard deviations unless specifically stated otherwise. The box plot line shows the median, the limits represent upper and lower quartiles, and whiskers indicate the minimum and maximum values. (b,d-f,k) One dot represents the measurement for one donor. Statistics were calculated using two-tailed paired t test, ns: not-significant.

## Supplementary Figure 6.

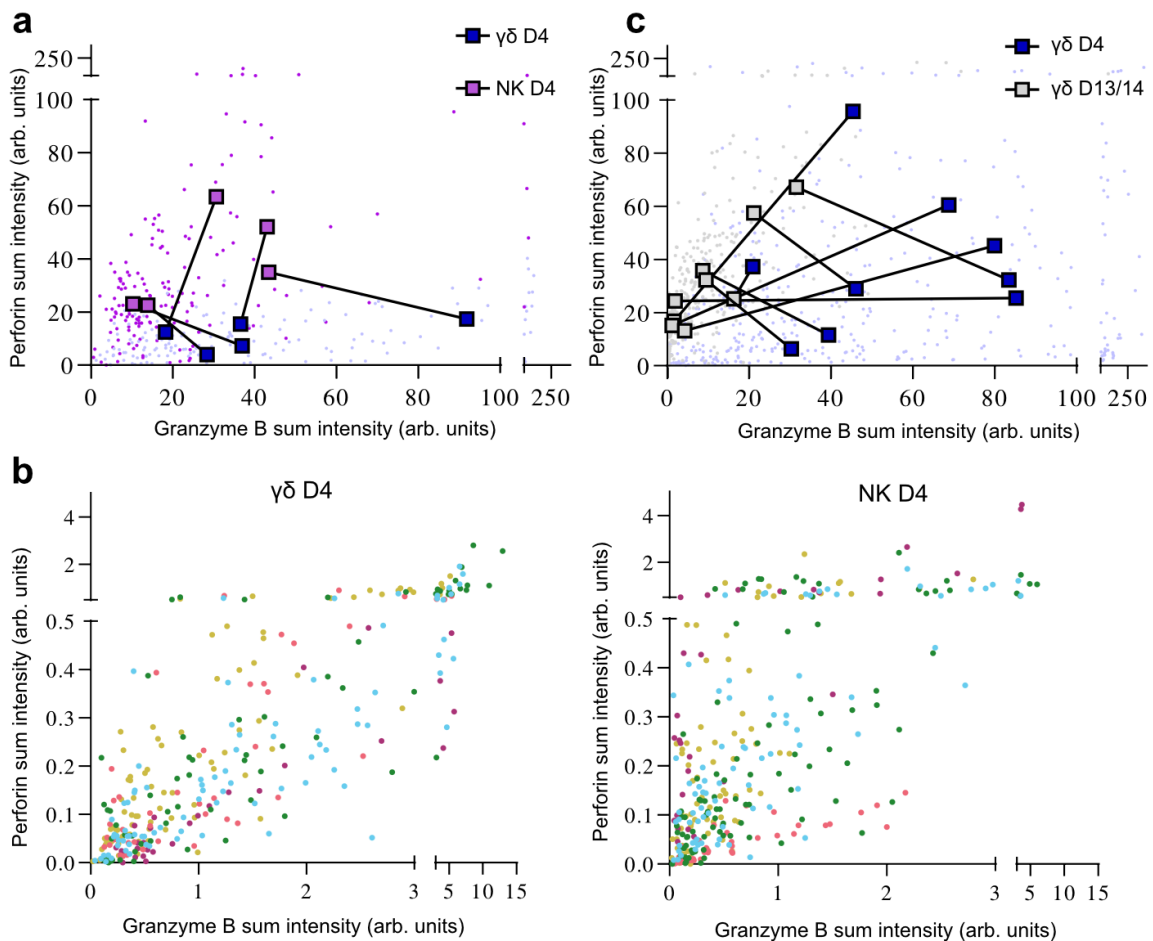

**Supplementary Figure 6.  $V\gamma 9V\delta 2$  T cells segregate granzyme B from perforin in different lytic vesicles** (a) Granzyme B and perforin signal sum intensity in CD107a+ vesicles of  $\gamma\delta$ D4 T cells and NKD4 cells (black lines connect cell types from the same donors). The square boxes are the means for each donor (n=5 donors, each  $\geq 15$  cells). To compensate for experimental fluctuations between experiments, the sum intensity of each object is normalized to the standard deviation of all objects measured from the condition (cell type) of that experiment. (b) Sum intensity of granzyme B versus perforin in all CD107a+ lytic vesicles of 5 representative cells for  $\gamma\delta$ D4 (left) or NKD4 (right). (c) Granzyme B and perforin signal mean intensity in CD107a+ vesicles of  $\gamma\delta$ D4 or  $\gamma\delta$ D13/14 T cells. The square boxes are the means for each donor (n=9 donors, each  $\geq 15$  cells). Lines connect cell types from the same donors. To compensate for experimental fluctuations between experiments, the sum intensity of each object is normalized to the standard deviation of all objects measured from the condition of that experiment.

Supplementary Figure 7.

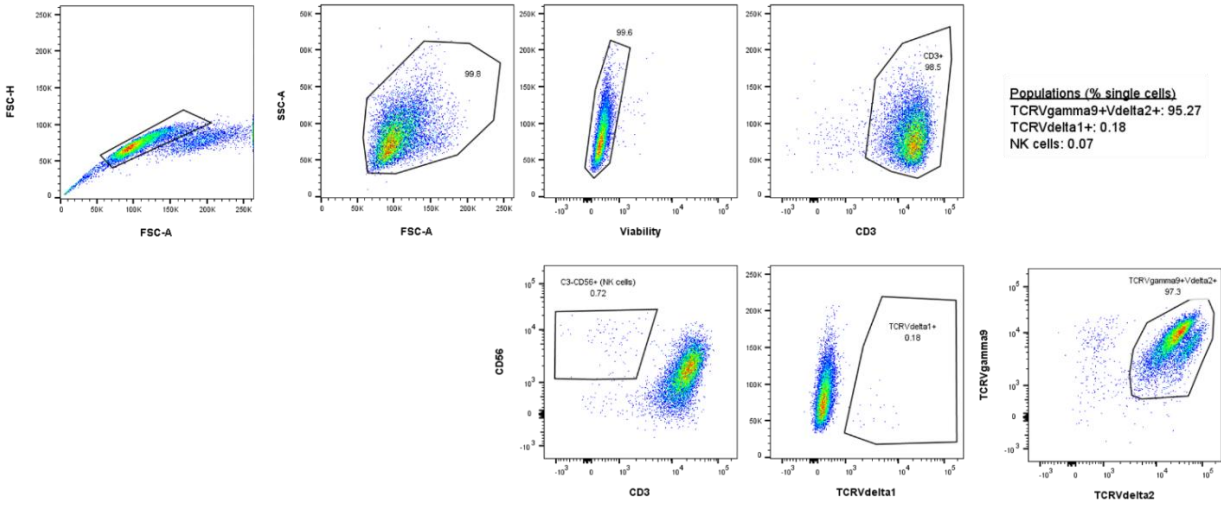

**Supplementary Figure 7.** Example of the gating strategy to assess the purity of Vγ9Vδ2 T cells (CD3+TCRVγ9+TCRVδ2+) after isolation as compared to NK (CD3-CD56+) and Vδ1+ cells (CD3+TCRVδ1+).

## Supplementary Table 1

| Antigen               | Clone       | Fluorophore     | Supplier        | Code         | RRID        | Dilution |
|-----------------------|-------------|-----------------|-----------------|--------------|-------------|----------|
| Actin/Phalloidin      |             | Alex Fluor 568  | Thermo Fisher   | A12380       |             | 1:10000  |
| BTN2A1                |             |                 | Sigma-Aldrich   | HPA019208    | AB_1845492  | 1:100    |
| CCR6                  | 11A9        | PE-Cy7          | BD Pharmingen   | 560620       | AB_1727440  | 1:40     |
| CCR7                  | 150503      | PE              | BD Pharmingen   | 560765       | AB_2033949  | 1:20     |
| CD107a                | H4A3        | Biotin          | BD Pharmingen   | 555799       | AB_396133   | 1:20     |
| CD107a                | H4A3        | BV421           | BD Horizon      | 562623       | AB_2737685  | 1:100    |
| CD107a                | H4A3        | Alex Fluor 647  | BD Pharmingen   | 562622       | AB_2737684  | 1:100    |
| CD16                  | 3G8         | APC             | BD Pharmingen   | 561248       | AB_10612010 | 1:50     |
| CD16                  | 3G8         | BV605           | BD Pharmingen   | 563172       | AB_2744297  | 1:50     |
| CD160                 | BY55        | FITC            | Invitrogen      | MA5-16600    | AB_2538099  | 1:40     |
| CD19                  | SJ25C1      | PE-Cy7          | BD Pharmingen   | 557835       | AB_396893   | 1:40     |
| CD200R                | OX108       | PE              | Invitrogen      | 12-9201-42   | AB_10717665 | 1:40     |
| CD223/Lag3            | 11C3C65     | PE              | BioLegend       | 369306       | AB_2629592  | 1:40     |
| CD244                 | eBioDM244   | APC             | Invitrogen      | 17-5837-42   | AB_10670227 | 1:40     |
| CD253/TRAIL           | RIK-2       | BV421           | BD Horizon      | 564243       | AB_2738696  | 1:50     |
| CD261/TRAIL-R1        | S35-934     | PE              | BD Pharmingen   | 564180       | AB_2738648  | 1:40     |
| CD262/TRAIL-R2        | YM366       | PE              | BD Pharmingen   | 565499       | AB_2732871  | 1:40     |
| CD27                  | M-T271      | BV421           | BD Horizon      | 562513       | AB_11153497 | 1:50     |
| CD277/BTN3A1          | 232-5       | BV605           | BD OptiBuild    | 742828       | AB_2741080  | 1:50     |
| CD277/BTN3A1          | 20.1, BT3.1 |                 | Invitrogen      | 14-2779-82   | AB_467550   | 1:50     |
| CD28                  | CD28.2      | BV510           | BioLegend       | 302936       | AB_2562030  | 1:100    |
| CD3                   | UCHT1       | Alexa Fluor 700 | BD Pharmingen   | 557943       | AB_396952   | 1:40     |
| CD45RA                | HI100       | BV605           | BD Horizon      | 562886       | AB_2737865  | 1:50     |
| CD45RO                | UCHL1       | PE-Cy7          | BD Pharmingen   | 560608       | AB_1727499  | 1:50     |
| CD56                  | B159        | PerCP-Cy5.5     | BD Pharmingen   | 560842       | AB_2033964  | 1:50     |
| CD62L                 | DREG-56     | PE              | BD Pharmingen   | 555544       | AB_395928   | 1:20     |
| CD63                  | H5C6-s      |                 | DSHB            |              | AB_528158   | 1:50     |
| CD8                   | SK1         | APC-H7          | BD Pharmingen   | 560179       | AB_1645481  | 1:40     |
| CD95/Fas              | DX2         | BV421           | BD Horizon      | 562616       | AB_2737679  | 1:40     |
| CX3CR1                | 2A9-1       | BV605           | BD OptiBuild    | 744488       | AB_2742268  | 1:40     |
| CD178/FasL            | NOK-1       | APC             | BD Pharmingen   | 564262       | AB_2738714  | 1:50     |
| CD226/DNAM1           | DX11        | BV605           | BD OptiBuild    | 742495       | AB_2740828  | 1:40     |
| Chondroitin Sulfate 4 | 2B6         |                 | AMSBIO          | 270432       | AB_10891938 | 1:10     |
| CTLA4                 | BN13        | BV421           | BD Horizon      | 562743       | AB_2737762  | 1:40     |
| Granulysin            | RB1         | Alexa Fluor 488 | BD Pharmingen   | 558254       | AB_2869123  | 1:10     |
| Granzyme A            | GzA-3G8.5   | PE              | Invitrogen      | 12-5831-82   | AB_2572631  | 1:40     |
| Granzyme B            | GB11        | Alexa Fluor 647 | BD Pharmingen   | 561999       | AB_10897997 | 1:40     |
| Granzyme B            | 496B        |                 | Invitrogen      | 14-8889-82   | AB_2572909  | 1:10     |
| Granzyme H            | P20718      | Alexa Fluor 488 | G Biosciences   | ITA2121      |             | 1:200    |
| Granzyme K            | G3H69       | Alexa Fluor 647 | BD Pharmingen   | 566655       | AB_2869812  | 1:40     |
| Granzyme M            | 4B2G4       | eFluor660       | Invitrogen      | 50-9774-42   | AB_2574374  | 1:100    |
| NKG2A                 | 131411      | BV605           | BD OptiBuild    | 747921       | AB_2872382  | 1:40     |
| NKG2C                 | REA205      | Vio Bright FITC | Miltenyi Biotec | 130-117-707  | AB_2728023  | 1:40     |
| NKG2D                 | 1D11        | PerCP-Cy5.5     | BD Pharmingen   | 562364       | AB_11154225 | 1:40     |
| Nkp30                 | p30-15      | BV510           | BD OptiBuild    | 743170       | AB_2741321  | 1:40     |
| Nkp44                 | p44-8       | BV421           | BD Pharmingen   | 744299       | AB_2742129  | 1:40     |
| Nkp46                 | 9E2         | PE-Cy7          | BD Pharmingen   | 562101       | AB_10894195 | 1:40     |
| PD1                   | EH12.1      | PE-Cy7          | BD Pharmingen   | 561272       | AB_10611585 | 1:40     |
| Perforin              | dG9         | Pacific Blue    | BioLegend       | 308118       | AB_10899565 | 1:50     |
| Perforin              | dG9         | Alexa Fluor 488 | BioLegend       | 308108       | AB_493252   | 1:20     |
| Perforin              | dG9         | PerCP-Cy5.5     | BD Pharmingen   | 563762       | AB_2738409  | 1:40     |
| Perforin              | Pf-344      | FITC            | Mabtech         | 3465-7       | AB_1925742  | 1:40     |
| Perforin              | Pf-344      | PF647P          | Mabtech         | 3465-72-100T | AB_2888642  | 1:40     |
| Streptavidin          |             | Alexa Fluor 568 | Invitrogen      | S11226       | AB_2315774  | 1:500    |
| TCR gd pan            | 11F2        | PE              | Miltenyi Biotec | 130-113-504  | AB_2733905  | 1:100    |
| TCR gd pan            | IMMU510     |                 | Beckman Coulter | IM1349       | AB_131619   | 1:50     |
| TCR Vd1               | TS8.2       | FITC            | Invitrogen      | TCR2730      | AB_223624   | 1:20     |
| TCR Vd2               | B6          | PE              | BioLegend       | 331408       | AB_1089232  | 1:40     |
| TCR Vd2               | B6          | APC/Cy7         | BioLegend       | 331439       | AB_2860864  | 1:40     |
| TCR Vg9               | B3          | FITC            | BioLegend       | 331306       | AB_1236403  | 1:40     |
| TCR Vg9               | B3          | PE-Cy7          | BioLegend       | 331320       | AB_2814209  | 1:40     |
| Tigit                 | A15153G     | Alexa Fluor 647 | BioLegend       | 372724       | AB_2715972  | 1:40     |
| TIM3                  | 7D3         | BV605           | BD OptiBuild    | 742856       | AB_2744030  | 1:40     |
| Viability stain 510   |             |                 | BD Horizon      | 564406       | AB_2869572  | 1:1000   |
| Viability stain 700   |             |                 | BD Horizon      | 564997       | AB_2869637  | 1:1000   |

## **Supplementary Table 1 Legend**

**List of the antibodies/staining used in this study.**
