# Supplementary material for: Modulation of lytic molecules restrain serial killing in γδ T lymphocytes
Source: PubMed Central journal article supplement (PMC10533871; doi:10.1038/s41467-023-41634-7), 2023-09-27
Supplement: 41467_2023_41634_MOESM11_ESM.pdf [file 41467_2023_41634_MOESM11_ESM.pdf]

## Reporting Summary

Nature Portfolio wishes to improve the reproducibility of the work that we publish. This form provides structure for consistency and transparency in reporting. For further information on Nature Portfolio policies, see our [Editorial Policies](#) and the [Editorial Policy Checklist](#).

### Statistics

For all statistical analyses, confirm that the following items are present in the figure legend, table legend, main text, or Methods section.

| n/a                                 | Confirmed                                                                                                                                                                                                                                                                                      |
|-------------------------------------|------------------------------------------------------------------------------------------------------------------------------------------------------------------------------------------------------------------------------------------------------------------------------------------------|
| <input type="checkbox"/>            | <input checked="" type="checkbox"/> The exact sample size ( $n$ ) for each experimental group/condition, given as a discrete number and unit of measurement                                                                                                                                    |
| <input type="checkbox"/>            | <input checked="" type="checkbox"/> A statement on whether measurements were taken from distinct samples or whether the same sample was measured repeatedly                                                                                                                                    |
| <input type="checkbox"/>            | <input checked="" type="checkbox"/> The statistical test(s) used AND whether they are one- or two-sided<br><i>Only common tests should be described solely by name; describe more complex techniques in the Methods section.</i>                                                               |
| <input checked="" type="checkbox"/> | <input type="checkbox"/> A description of all covariates tested                                                                                                                                                                                                                                |
| <input checked="" type="checkbox"/> | <input type="checkbox"/> A description of any assumptions or corrections, such as tests of normality and adjustment for multiple comparisons                                                                                                                                                   |
| <input type="checkbox"/>            | <input checked="" type="checkbox"/> A full description of the statistical parameters including central tendency (e.g. means) or other basic estimates (e.g. regression coefficient) AND variation (e.g. standard deviation) or associated estimates of uncertainty (e.g. confidence intervals) |
| <input type="checkbox"/>            | <input checked="" type="checkbox"/> For null hypothesis testing, the test statistic (e.g. $F$ , $t$ , $r$ ) with confidence intervals, effect sizes, degrees of freedom and $P$ value noted<br><i>Give <math>P</math> values as exact values whenever suitable.</i>                            |
| <input checked="" type="checkbox"/> | <input type="checkbox"/> For Bayesian analysis, information on the choice of priors and Markov chain Monte Carlo settings                                                                                                                                                                      |
| <input checked="" type="checkbox"/> | <input type="checkbox"/> For hierarchical and complex designs, identification of the appropriate level for tests and full reporting of outcomes                                                                                                                                                |
| <input checked="" type="checkbox"/> | <input type="checkbox"/> Estimates of effect sizes (e.g. Cohen's $d$ , Pearson's $r$ ), indicating how they were calculated                                                                                                                                                                    |

*Our web collection on [statistics for biologists](#) contains articles on many of the points above.*

### Software and code

Policy information about [availability of computer code](#)

|                 |                                                                                                                                                                                                                                                                                                  |
|-----------------|--------------------------------------------------------------------------------------------------------------------------------------------------------------------------------------------------------------------------------------------------------------------------------------------------|
| Data collection | Airyscan confocal images were acquired using Zen software (Carl Zeiss) version 2.3 SP1. Widefield time-lapse microscopy was acquired using either Zen software (Carl Zeiss) version 3.1 (ZEN PRO) or 2 (blue version). Flow cytometry data was acquired using BD FACS Diva software version 9.0. |
| Data analysis   | Images were analysed using ImageJ (NIH) fiji-win64x version and Imaris software (Oxford Instruments) x64 version 9.5.1. Flow cytometry data was analysed using FlowJo (BD) version 10.7.1.                                                                                                       |

For manuscripts utilizing custom algorithms or software that are central to the research but not yet described in published literature, software must be made available to editors and reviewers. We strongly encourage code deposition in a community repository (e.g. GitHub). See the Nature Portfolio [guidelines for submitting code & software](#) for further information.

### Data

Policy information about [availability of data](#)

All manuscripts must include a [data availability statement](#). This statement should provide the following information, where applicable:

- Accession codes, unique identifiers, or web links for publicly available datasets
- A description of any restrictions on data availability
- For clinical datasets or third party data, please ensure that the statement adheres to our [policy](#)

The data that support the findings of this study are available from the corresponding author upon reasonable request.

## Research involving human participants, their data, or biological material

Policy information about studies with [human participants or human data](#). See also policy information about [sex, gender \(identity/presentation\), and sexual orientation](#) and [race, ethnicity and racism](#).

|                                                                    |                                                                                                                                                                                                                                                                                                  |
|--------------------------------------------------------------------|--------------------------------------------------------------------------------------------------------------------------------------------------------------------------------------------------------------------------------------------------------------------------------------------------|
| Reporting on sex and gender                                        | Anonymous buffy coats from healthy human donors were obtained from the Karolinska Hospital (Sweden) and used to isolate specific immune cells for this study. This requires no ethical permit according to the local regulations. No sex or gender information is provided with the buffy coats. |
| Reporting on race, ethnicity, or other socially relevant groupings | No race, ethnicity or other socially relevant groupings information is provided with the buffy coats.                                                                                                                                                                                            |
| Population characteristics                                         | The cohort consists of healthy donors, no covariates are included.                                                                                                                                                                                                                               |
| Recruitment                                                        | The anonymous buffy coats from healthy donors were obtained from the department of Klinisk immunologi och transfusionsmedicin in Karolinska Hospital, Huddinge, Sweden.                                                                                                                          |
| Ethics oversight                                                   | Not applicable                                                                                                                                                                                                                                                                                   |

Note that full information on the approval of the study protocol must also be provided in the manuscript.

## Field-specific reporting

Please select the one below that is the best fit for your research. If you are not sure, read the appropriate sections before making your selection.

Life sciences  Behavioural & social sciences  Ecological, evolutionary & environmental sciences

For a reference copy of the document with all sections, see [nature.com/documents/nr-reporting-summary-flat.pdf](https://www.nature.com/documents/nr-reporting-summary-flat.pdf)

## Life sciences study design

All studies must disclose on these points even when the disclosure is negative.

|                 |                                                                                                                                                                                                                                                                                                                                                                                                                                                                                                                                                                                                                                                                                                                                                                 |
|-----------------|-----------------------------------------------------------------------------------------------------------------------------------------------------------------------------------------------------------------------------------------------------------------------------------------------------------------------------------------------------------------------------------------------------------------------------------------------------------------------------------------------------------------------------------------------------------------------------------------------------------------------------------------------------------------------------------------------------------------------------------------------------------------|
| Sample size     | For electron microscopy and for immunofluorescence Airyscan microscopy, at least 20 cells were imaged at high resolution for each donor. For flow cytometry, at least 6 donors for each marker were measured and analysed. The live-cell killing assays were performed for at least 3 donors per condition tested. For these assays, the behaviour of at least 100 gamma delta T effector cells aimed to be manually analysed per condition. For a few experiments, this number was not reached (e.g. 65 or 80 cells available). In such case, more experiments were conducted with new donors for all conditions and added to the dataset (n > 3). The sample size was determined without statistical methods but based on previous publications in the field. |
| Data exclusions | No technically successful experiment was excluded. Experiments with technical issues (e.g. loss of focus during imaging) were not analysed. In figure 3f,g,i,j: one condition is not provided (events in untreated cells - D14) due to the very low occurrence of these events which prevents any statistical analysis. This exclusion is stated in the text of the manuscript (lines 234-236).                                                                                                                                                                                                                                                                                                                                                                 |
| Replication     | At least three independent experiments were performed for each of the assays in the manuscript. No technically successful replicate was excluded.                                                                                                                                                                                                                                                                                                                                                                                                                                                                                                                                                                                                               |
| Randomization   | The assigned compartment in the microwell chip for each condition was alternated between the replicates assuring randomization of the conditions.                                                                                                                                                                                                                                                                                                                                                                                                                                                                                                                                                                                                               |
| Blinding        | Electron microscopy lytic granules analysis was blind. The cells were prepared by the first authors in Stockholm and analyzed by another author in Oslo without knowing the corresponding conditions. Immunofluorescence Airyscan microscopy of granzyme B and perforin was analysed automatically. The image datasets of the live-cell killing assays were randomly assigned to two researchers and independently analysed based on defined criteria and supported by automatic signal intensity measurements.                                                                                                                                                                                                                                                 |

## Reporting for specific materials, systems and methods

We require information from authors about some types of materials, experimental systems and methods used in many studies. Here, indicate whether each material, system or method listed is relevant to your study. If you are not sure if a list item applies to your research, read the appropriate section before selecting a response.

## Materials &amp; experimental systems

| n/a                                 | Involvement                                               |
|-------------------------------------|-----------------------------------------------------------|
| <input type="checkbox"/>            | <input checked="" type="checkbox"/> Antibodies            |
| <input type="checkbox"/>            | <input checked="" type="checkbox"/> Eukaryotic cell lines |
| <input checked="" type="checkbox"/> | <input type="checkbox"/> Palaeontology and archaeology    |
| <input checked="" type="checkbox"/> | <input type="checkbox"/> Animals and other organisms      |
| <input checked="" type="checkbox"/> | <input type="checkbox"/> Clinical data                    |
| <input checked="" type="checkbox"/> | <input type="checkbox"/> Dual use research of concern     |
| <input checked="" type="checkbox"/> | <input type="checkbox"/> Plants                           |

## Methods

| n/a                                 | Involvement                                        |
|-------------------------------------|----------------------------------------------------|
| <input checked="" type="checkbox"/> | <input type="checkbox"/> ChIP-seq                  |
| <input type="checkbox"/>            | <input checked="" type="checkbox"/> Flow cytometry |
| <input checked="" type="checkbox"/> | <input type="checkbox"/> MRI-based neuroimaging    |

## Antibodies

## Antibodies used

Antibodies used in this study (as in Supplementary Table 1):

(Antigen Clone Fluorophore Supplier Code RRID)  
 Actin/Phalloidin Alex Fluor 568 Thermo Fisher A12380  
 BTN2A1 Sigma-Aldrich HPA019208 AB\_1845492  
 CCR6 11A9 PE-Cy7 BD Pharmingen 560620 AB\_1727440  
 CCR7 150503 PE BD Pharmingen 560765 AB\_2033949  
 CD107a H4A3 Biotin BD Pharmingen 555799 AB\_396133  
 CD107a H4A3 BV421 BD Horizon 562623 AB\_2737685  
 CD107a H4A3 Alex Fluor 647 BD Pharmingen 562622 AB\_2737684  
 CD16 3G8 APC BD Pharmingen 561248 AB\_10612010  
 CD16 3G8 BV605 BD Pharmingen 563172 AB\_2744297  
 CD160 BY55 FITC Invitrogen MA5-16600 AB\_2538099  
 CD19 SJ25C1 PE-Cy7 BD Pharmingen 557835 AB\_396893  
 CD200R OX108 PE Invitrogen 12-9201-42 AB\_10717665  
 CD223/Lag3 11C3C65 PE BioLegend 369306 AB\_2629592  
 CD244 eBioDM244 APC Invitrogen 17-5837-42 AB\_10670227  
 CD253/TRAIL RIK-2 BV421 BD Horizon 564243 AB\_2738696  
 CD261/TRAIL-R1 S35-934 PE BD Pharmingen 564180 AB\_2738648  
 CD262/TRAIL-R2 YM366 PE BD Pharmingen 565499 AB\_2732871  
 CD27 M-T271 BV421 BD Horizon 562513 AB\_11153497  
 CD277/BTN3A1 232-5 BV605 BD OptiBuild 742828 AB\_2741080  
 CD277/BTN3A1 20.1, BT3.1 Invitrogen 14-2779-82 AB\_467550  
 CD28 CD28.2 BV510 BioLegend 302936 AB\_2562030  
 CD3 UCHT1 Alexa Fluor 700 BD Pharmingen 557943 AB\_396952  
 CD45RA HI100 BV605 BD Horizon 562886 AB\_2737865  
 CD45RO UCHL1 PE-Cy7 BD Pharmingen 560608 AB\_1727499  
 CD56 B159 PerCP-Cy5.5 BD Pharmingen 560842 AB\_2033964  
 CD62L DREG-56 PE BD Pharmingen 555544 AB\_395928  
 CD63 H5C6-s DSHB AB\_528158  
 CD8 SK1 APC-H7 BD Pharmingen 560179 AB\_1645481  
 CD95/Fas DX2 BV421 BD Horizon 562616 AB\_2737679  
 CX3CR1 2A9-1 BV605 BD OptiBuild 744488 AB\_2742268  
 CD178/FasL NOK-1 APC BD Pharmingen 564262 AB\_2738714  
 CD226/DNAM1 DX11 BV605 BD OptiBuild 742495 AB\_2740828  
 Chondroitin Sulphate 4 2B6 AMSBIO 270432 AB\_10891938  
 CTLA4 BNI3 BV421 BD Horizon 562743 AB\_2737762  
 Granulysin RB1 Alexa Fluor 488 BD Pharmingen 558254 AB\_2869123  
 Granzyme A GzA-3G8.5 PE Invitrogen 12-5831-82 AB\_2572631  
 Granzyme B GB11 Alexa Fluor 647 BD Pharmingen 561999 AB\_10897997  
 Granzyme B 496B Invitrogen 14-8889-82 AB\_2572909  
 Granzyme H P20718 Alexa Fluor 488 G Biosciences ITA2121  
 Granzyme K G3H69 Alexa Fluor 647 BD Pharmingen 566655 AB\_2869812  
 Granzyme M 4B2G4 eFluor660 Invitrogen 50-9774-42 AB\_2574374  
 NKG2A 131411 BV605 BD OptiBuild 747921 AB\_2872382  
 NKG2C REA205 Vio Bright FITC Miltenyi Biotech 130-117-707 AB\_2728023  
 NKG2D 1D11 PerCP-Cy5.5 BD Pharmingen 562364 AB\_11154225  
 Nkp30 p30-15 BV510 BD OptiBuild 743170 AB\_2741321  
 Nkp44 p44-8 BV421 BD Pharmingen 744299 AB\_2742129  
 Nkp46 9E2 PE-Cy7 BD Pharmingen 562101 AB\_10894195  
 PD1 EH12.1 PE-Cy7 BD Pharmingen 561272 AB\_10611585  
 Perforin dG9 Pacific Blue BioLegend 308118 AB\_10899565  
 Perforin dG9 Alexa Fluor 488 BioLegend 308108 AB\_493252  
 Perforin dG9 PerCP-Cy5.5 BD Pharmingen 563762 AB\_2738409  
 Perforin Pf-344 FITC Mabtech 3465-7 AB\_1925742  
 Perforin Pf-344 PF647P Mabtech 3465-72-100T AB\_2888642  
 Streptavidin Alexa Fluor 568 Invitrogen S11226 AB\_2315774  
 TCR gd pan 11F2 PE Miltenyi Biotech 130-113-504 AB\_2733905  
 TCR gd pan IMMUS10 Beckman Coulter IM1349 AB\_131619

TCR Vd1 TS8.2 FITC Invitrogen TCR2730 AB\_223624  
 TCR Vd2 B6 PE BioLegend 331408 AB\_1089232  
 TCR Vd2 B6 APC/Cy7 BioLegend 331439 AB\_2860864  
 TCR Vg9 B3 FITC BioLegend 331306 AB\_1236403  
 TCR Vg9 B3 PE-Cy7 BioLegend 331320 AB\_2814209  
 Tigit A15153G Alexa Fluor 647 BioLegend 372724 AB\_2715972  
 TIM3 7D3 BV605 BD OptiBuild 742856 AB\_2744030  
 Viability stain 510 BD Horizon 564406 AB\_2869572  
 Viability stain 700 BD Horizon 564997 AB\_2869637

## Validation

All the antibodies used in this study are commonly used for research in immunology and/or microscopy. They are well described and have been validated in previous publications or by the vendor. See for example anti-Granzyme B 496B from Invitrogen: <https://www.thermofisher.com/antibody/product/Granzyme-B-Antibody-clone-496B-Monoclonal/14-8889-82> with validation and references. anti-Granzyme B GB11 from BD Biosciences: <https://wwwbdbiosciences.com/en-eu/products/reagents/flow-cytometry-reagents/research-reagents/single-color-antibodies-ruo/alexa-fluor-647-mouse-anti-human-granzyme-b.561999> used by experts in microscopy of lytic granules: <https://doi.org/10.1073/pnas.2010274117> anti-CD3 UCHT1 from BD Biosciences: <https://wwwbdbiosciences.com/en-us/products/reagents/flow-cytometry-reagents/research-reagents/single-color-antibodies-ruo/alexa-fluor-700-mouse-anti-human-cd3.557943> and its references. anti-perforin dG9 from BioLegend: <https://www.biolegend.com/en-us/products/pacific-blue-anti-human-perforin-antibody-7265> with validation and multiple citations. anti-CD107a H4A3 from BD Biosciences: <https://wwwbdbiosciences.com/en-ca/products/reagents/flow-cytometry-reagents/research-reagents/single-color-antibodies-ruo/biotin-mouse-anti-human-cd107a.555799> with multiple citations anti-panTCRgd IMMU510 from Beckman Coulter: <https://www.beckman.com/reagents/coulter-flow-cytometry/antibodies-and-kits/single-color-antibodies/tcr-pan-g-d/im1349> with validation and multiple citations. There are no gifted antibodies in this study.

## Eukaryotic cell lines

Policy information about [cell lines and Sex and Gender in Research](#)

## Cell line source(s)

Main cell line: A498, ATCC, HTB-44™

In extended data figure 3c:

DLD1, ATCC  
 HeLa, ATCC  
 Daudi, ATCC  
 K562, ATCC  
 U251, provided by collaborators  
 Kazumi, provided by collaborators

## Authentication

The A498 cell line has been validated using PCR-based single-locus technology. DLD1, HeLa, Daudi and K562 were bought directly at ATCC and expanded from the original vial for the present project and therefore not further validated. U251 and Kazumi (only used in Extended Data Figure 3c) were not validated as they play a minor role in the study.

## Mycoplasma contamination

All cell lines were tested negative for mycoplasma (testing performed at Eurofins).

Commonly misidentified lines  
(See [ICLAC](#) register)

None

## Flow Cytometry

### Plots

Confirm that:

- The axis labels state the marker and fluorochrome used (e.g. CD4-FITC).
- The axis scales are clearly visible. Include numbers along axes only for bottom left plot of group (a 'group' is an analysis of identical markers).
- All plots are contour plots with outliers or pseudocolor plots.
- A numerical value for number of cells or percentage (with statistics) is provided.

### Methodology

## Sample preparation

Entire PBMCs or gamma delta T cells isolated from PBMC or NK cells isolated from PBMC were washed with PBS, stained with fluorophore-conjugated antibodies for 15 min at RT in the dark, washed again with PBS prior to measurement by flow cytometry.

## Instrument

BD FACS Canto II.

## Software

Samples measurements were collected using BD FACS Diva Software V9.0 and the data was analyzed using FlowJo (BD)

|                           |                                                                                                                                                                                                                                                                                                                                                                                                                        |
|---------------------------|------------------------------------------------------------------------------------------------------------------------------------------------------------------------------------------------------------------------------------------------------------------------------------------------------------------------------------------------------------------------------------------------------------------------|
| Software                  | version 10.7.1.                                                                                                                                                                                                                                                                                                                                                                                                        |
| Cell population abundance | Gamma delta TCR+ cells in fresh PBMCs was measured to be from 0.25% up to 15.8% of T cells. For non-FACS-based experiments, gamma delta T cells were isolated using MACS and only isolations with more than 90% gamma delta T cell purity were used for the assays.                                                                                                                                                    |
| Gating strategy           | 1. Singlets were gated from the FSC-A/FSC-H plot as the population with a linear signal correlation. 2. Lymphocytes were gated on the FSC/SSC-A plot. 3. Dead cells were excluded using a viability/death marker. 4. T cells were gated on using the marker CD3-alexa700 (population with signal over $10^3$ ). Vg9Vd2+ T cells were gated using anti-Vg9-FITC and anti-Vd2-PE antibodies (both signals over $10^3$ ). |

Tick this box to confirm that a figure exemplifying the gating strategy is provided in the Supplementary Information.
